# Supplementary material for: Risk of Newly Incident Diabetes Mellitus and Treatment Risk Factors in Breast Cancer Survivors: Landmark Analyses of Nationwide Data
Source: Research Square preprint supplement (doi:10.21203/rs.3.rs-6010947/v1), 2025-02-17
Supplement: Supplementary file 1 [file b3893666257fd6df7cdf4c2a.docx]

**Supplementary Table 1** Overview of Studies on the Association Between Breast Cancer and Diabetes Mellitus Risk

| **Study** | **Population** | **Analysis by age** | **Short-Term and Long-Term Risk Analysis** | **Adjusted factors** | **Considering of competing risks** | **Key findings regarding DM** |
| --- | --- | --- | --- | --- | --- | --- |
| Lipscombe, 2013 | Canada, Ontario Cancer Registry  (OCR) 24,976 BC vs 124,880 non-BC | - (Age ≥55) | + Cumulative incidence at year 2, 5, 10 | Age, income, region, comorbidities | + | **HR 1.07** at year 2 (95% CI 1.02-1.12)  **HR 1.12** at year 5 (95% CI 1.07-1.17)  **HR 1.21** at year 10 (95% CI 1.09-1.35) |
| Sun, 2014 | Taiwan, Taiwanese National Health Insurance Research Database 22,257 BC vs 89,028 non-BC | O (cutoff age: 55) | +  Cumulative incidence for 12 years | Age, insured amoun t, comorbidity, steroids, medications, chemotherapy, radiotherapy | - | **aHR 1.14** (95% CI 1.08-1.20) |
| Hwangbo, 2018 | Korea, Nationwide 1,434 BC | - | - | Age, sex, BMI, smoking, alcohol drinking, comorbidities | - | **HR of 1.60** (95% CI 1.27-2.01) |
| Ng, 2018 | Australia, Nationwide 2,421 BC vs 24,210 non-BC | - | - | comorbidities | - | **HR 1.24** (95% CI 1.10-1.41) |
| Accordino, 2020 | USA, SEER-Medicare database 14,506 BC patients vs 13,529 non-BC | - (Age ≥66) | - | Age, diagnosis year, mariatal satus, race, region, hospital location, SES, comorbidities, obesity | - | **22.3%** of BC patients vs 16.5% of controls (p<0.01) |
| Wang, 2020 | Taiwan, Nationwide 4,607 BC patients vs 23,035 non-BC | - (Age ≥55) | + HR at every year of 1~15 | Age, income, urbanization, comorbidities | - | **aHR 1.70** at 1 year (95% CI 1.40-2.05),  **aHR 1.24** at 15 year (95% CI 1.11-1.40) |
| Kwan, 2022 | USA, Kaiser Permanente Northern California  (KPNC) 12,903 BC patients vs 64,862 non-BC | -  (Age ≥21) | - Cumulative incidence at year 2, 5, 10 | BMI, menopausal status, smoking status, income, education, comorbidities, hospital visits | + | **sHR 1.16** (95% CI 1.07-1.26)  cumulative incidence persisted after 10 years compared to control group (**9.3%** vs 8.8%) |

**Supplementary Table 2** Overview of Studies on the Association Between Breast Cancer treatment methods and Diabetes Mellitus Risk

| **Study** | **Population** | **Analysis by age** | **Short-Term and Long-Term Risk Analysis** | **Adjusted factors** | **Considering of death as competing risks** | **Key findings regarding DM** |
| --- | --- | --- | --- | --- | --- | --- |
| Lipscombe, 2012 | Canada, Ontario Cancer Registry  (OCR) 14,360 BC | - (Age ≥66) | - | Income, comorbidity, rural residence, chemotherapy, medications | - | **OR 1.24** for current or recent past tamoxifen use (95% CI 1.08-1.42)  No association between AI use and DM |
| Lipscombe, 2013 | Canada, Canada, Ontario Cancer Registry (OCR) 24,976 BC vs 124,880 non-BC | - (Age ≥55) | O Cumulative incidence at year 2, 5, 10 | Age, income, comorbidity, residence |  | **HR 1.24** for adjuvant chemotherapy at year 2 (95% CI 1.12-1.38)  **HR 1.18** for adjuvant chemotherapy at year 5 (95% CI 1.03-1.35)  **HR 1.08** for adjuvant chemotherapy at year 10 (95% CI 0.79-1.48) |
| Sun, 2014 | Taiwan, Taiwanese National Health Insurance Research Database 22,257 BC | O (cutoff age: 55) | +  Cumulative incidence for 12 years | Age, insured amoun t, comorbidity, steroids, medications, chemotherapy, radiotherapy | - | **HR 1.31** for tamoxifen (95% CI 1.19-1.47)  **HR 0.59** for AI (95% CI 0.43-0.80)  **HR 0.68** for both (95% CI 0.60-0.78) |
| Santorelli, 2016 | USA, Surveillance, Epidemiology, and End Results (SEER) Medicare  2,678 BC vs 8,820 non-BC | - (Age ≥65) | Only short-term (2 years) | Age, race, NCI index, comorbidities | - | No association between HT and DM |
| Hamood, 2018 | Israel, ﻿ Leumit health care  fund  2,246 BC | - | - | Ethnicity, residence, cohabitation status, income, education, employment, chemotherapy type, outpatient visits, use of corticosteroids, medications, year of breast cancer diagnosis, comorbidies | + | **HR 2.4** for HT (95% CI 1.26-4.55)  **HR 2.25** for tamoxifen (95% CI 1.19-4.26)  **HR 4.27** for AI (95% CI 1.42-12.84) |
| Ng, 2018 | Australia, ﻿Pharmaceutical Benefits Scheme (PBS)  2421 BC vs 24,210 non-BC | - | - | Comorbidities, age | - | **HR 1.36** for tamoxifen (95% CI 1.08-1.71)  No association between AI use and DM |
| Accordino, 2020 | USA, SEER-Medicare database 14,506 BC patients vs 13,529 non-BC | - (Age ≥66) | - | Age, gender, race, year of diagnosis, mariatal status, region, hospital location, socioeconomic status, surgery, chemotherapy, comorbidity, obesity | - | **OR 1.19** for chemotherapy (95% CI 1.08-1.31) |
| Wang, 2020 | Taiwan, Nationwide 4,607 BC patients vs 23,035 non-BC | - (Age ≥55) | O HR at every year of 1~15 | Age, income, cancer stage, comorbidity | + | No association between hormonal therapy and DM |
| Kim, 2022 | Korea, ﻿National Health Insurance Service database of Korea 133,171 BC patients | + (Cutoff age: 60) | - | Age, income, residence, histological subtype, surgery, chemotherapy, radiotherapy, trastuzumab, comorbidities | - | **HR 1.22** for SERM user (95% CI 1.14-1.30)  **HR 1.22** for AI user (95% CI 1.14-1.31)  **HR 1.24** for both user (95% CI 1.12-1.38) |
| Kwan, 2022 | USA, ﻿ Kaiser Permanente Northern California (KPNC) registry  12,903 BC patients vs 64,862 non-BC | - | - Cumulative incidence at year 2, 5, 10 | BMI, menopausal status, smoking, income, education level, comorbidity, outpatient visit | + | **HR 1.23** for endocrine therapy (95% CI 1.12-1.34) |
